# Supplementary material for: Arbovirus Transmission Predictions Are Affected by Both Temperature Data Source and Modeling Methodologies across Cities in Colombia
Source: MDPI journal article supplement (doi:10.3390/microorganisms11051249), 2023-05-09

## Supplemental File S1

*Micro-environmental temperatures and  $R_0$* , Peña-García et al.

**Figure S1.1:** Values recorded by temperature data loggers in the three cities at six different hours along the day.

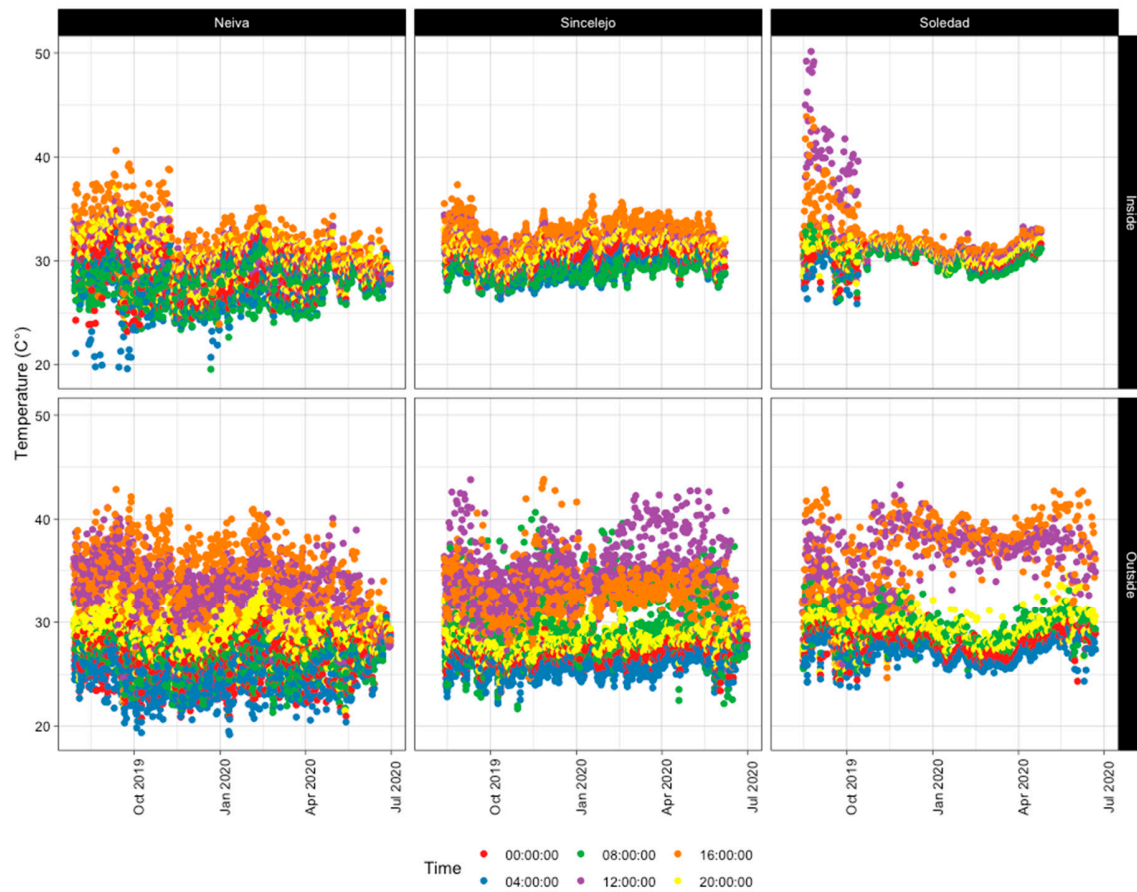

**Supplemental Table S1.1:** Results of t-test comparison analyses between daily mean temperature values taken indoor (IHT), outdoor (OHT) and weather stations (WST). *p*-values in bold italic are statistically significant at 95% confidence.

| City      | House | Comparison | t      | <i>p</i> -value         |
|-----------|-------|------------|--------|-------------------------|
| Neiva     | NE1   | IHT vs OHT | 1.670  | 0.095                   |
|           |       | IHT vs WST | -5.165 | <b><i>3.26E-07</i></b>  |
|           |       | OHT vs WST | -6.946 | <b><i>8.61E-12</i></b>  |
|           | NE2   | IHT vs OHT | 1.655  | 0.101                   |
|           |       | IHT vs WST | 5.017  | <b><i>1.02E-05</i></b>  |
|           |       | OHT vs WST | 2.187  | <b><i>0.031</i></b>     |
|           | NE3   | IHT vs OHT | 3.010  | <b><i>0.003</i></b>     |
|           |       | IHT vs WST | 9.734  | <b><i>4.41E-21</i></b>  |
|           |       | OHT vs WST | 7.053  | <b><i>4.25E-12</i></b>  |
|           | NE4   | OHT vs WST | 0.277  | 0.782                   |
|           | NE5   | IHT vs OHT | 11.472 | <b><i>4.89E-24</i></b>  |
|           |       | IHT vs WST | 16.381 | <b><i>3.45E-38</i></b>  |
|           |       | OHT vs WST | 5.431  | <b><i>8.32E-08</i></b>  |
| Sincelejo | SI1   | IHT vs OHT | 5.386  | <b><i>1.59E-07</i></b>  |
|           |       | IHT vs WST | 19.486 | <b><i>1.32E-57</i></b>  |
|           |       | OHT vs WST | 10.384 | <b><i>2.74E-21</i></b>  |
|           | SI2   | IHT vs OHT | 12.541 | <b><i>7.46E-31</i></b>  |
|           |       | IHT vs WST | 16.835 | <b><i>2.79E-50</i></b>  |
|           |       | OHT vs WST | 5.606  | <b><i>3.01E-08</i></b>  |
|           | SI3   | OHT vs WST | 9.759  | <b><i>4.04E-21</i></b>  |
|           | SI4   | IHT vs OHT | 14.356 | <b><i>2.15E-40</i></b>  |
|           |       | IHT vs WST | 28.709 | <b><i>5.16E-118</i></b> |
|           |       | OHT vs WST | 12.370 | <b><i>8.27E-32</i></b>  |
|           | SI5   | IHT vs OHT | 12.267 | <b><i>8.49E-27</i></b>  |
|           |       | IHT vs WST | 24.035 | <b><i>3.23E-92</i></b>  |
|           |       | OHT vs WST | 4.201  | <b><i>3.74E-05</i></b>  |
| Soledad   | SO2   | IHT vs OHT | 13.049 | <b><i>5.21E-27</i></b>  |
|           | SO3   | IHT vs OHT | 3.821  | <b><i>0.002</i></b>     |

**Supporting Table S1.2:** Summary of linear associations between OHT and IHT daily-averaged temperatures. (Model: IHT = OHT)

| City      | Month  | Intercept  | Slope      | $R^2$ |
|-----------|--------|------------|------------|-------|
| Neiva     | jul-19 | 10.9391837 | 0.64602022 | 0.80  |
|           | aug-19 | 6.75190908 | 0.78937529 | 0.71  |
|           | sep-19 | 7.08511394 | 0.78605929 | 0.79  |
|           | oct-19 | 9.14904805 | 0.70472738 | 0.83  |
|           | nov-19 | 3.06841794 | 0.90694088 | 0.90  |
|           | dec-19 | 19.0461326 | 0.31485739 | 0.24  |
|           | jan-20 | 11.8745302 | 0.59715459 | 0.59  |
|           | feb-20 | 8.10444521 | 0.73249626 | 0.93  |
|           | mar-20 | 11.357985  | 0.61376135 | 0.85  |
|           | apr-20 | 1.23906931 | 0.97915962 | 0.69  |
|           | may-20 | 12.7036514 | 0.58785226 | 0.64  |
|           | jun-20 | 14.0789538 | 0.52246391 | 0.69  |
| Sincelejo | aug-19 | 10.7956842 | 0.68067997 | 0.93  |
|           | sep-19 | 7.52881355 | 0.78505737 | 0.83  |
|           | oct-19 | 8.61310222 | 0.73656881 | 0.83  |
|           | nov-19 | 10.7403438 | 0.66392409 | 0.81  |
|           | dec-19 | 16.4451649 | 0.48178219 | 0.61  |
|           | jan-20 | 9.70132749 | 0.71903774 | 0.78  |
|           | feb-20 | 10.4578667 | 0.70018186 | 0.83  |
|           | mar-20 | 14.8638782 | 0.55712997 | 0.59  |
|           | apr-20 | 11.6499929 | 0.65007331 | 0.83  |
|           | may-20 | 13.3334245 | 0.58757893 | 0.77  |
|           | jun-20 | 17.5570976 | 0.42604734 | 0.73  |
| Soledad   | aug-19 | 5.79725172 | 0.88204092 | 0.81  |
|           | sep-19 | 6.85997423 | 0.83434497 | 0.95  |
|           | oct-19 | 13.6651609 | 0.59936162 | 0.67  |
|           | nov-19 | 23.2756706 | 0.26899443 | 0.46  |
|           | dec-19 | 25.4461461 | 0.18043655 | 0.24  |
|           | jan-20 | 15.60591   | 0.46743913 | 0.53  |
|           | feb-20 | 13.2720983 | 0.53794684 | 0.56  |
|           | mar-20 | 14.1821195 | 0.51395315 | 0.24  |
|           | apr-20 | 20.5418323 | 0.34254735 | 0.16  |

**Supporting Fig. S1.2:** Regression analyses performed on HOBO-recorded outdoor and indoor daily averages for each month and each city.

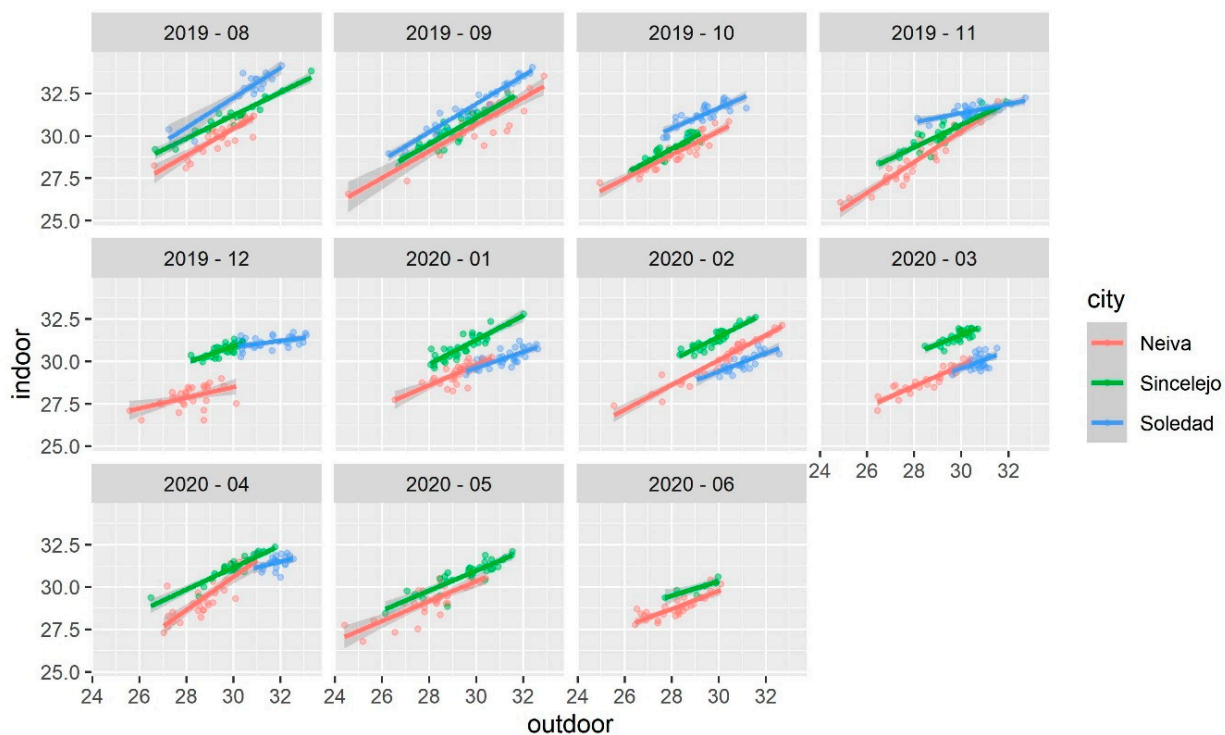

Supplement: s1 [file s1]
