# Supplementary material for: Arbovirus Transmission Predictions Are Affected by Both Temperature Data Source and Modeling Methodologies across Cities in Colombia
Source: MDPI journal article supplement (doi:10.3390/microorganisms11051249), 2023-05-09

## Supplemental File S2: Temperature Dependence in Model Parameters

*Micro-environmental temperatures and R0*, Peña-Garcia et al.

Mosquito density was derived by Caminade from data in Kraemer et al 2015. Those values are as follows: For *Ae. aegypti* in the city of Neiva, mosquito density ( $m_1$ ) was 731.721069, while in Sincelejo,  $m_1=752.021729$ , and in Soledad,  $m_1 = 894.557617$ . For *Ae. albopictus*,  $m_2 = 668.480164$  for Neiva,  $m_2= 383.251526$  for Sincelejo, and  $m_2= 177.526230$  for Soledad. We used these same estimates to initialize adult mosquito density for derivation of temperature dependent adult mosquito density in the  $R_0$  calculations for the Caminade and the Liu-Helmersson methods.

Across the three methods there were commonalities in included parameters:

- Biting rate
  - $a$  for Liu-Helmersson and Mordecai methods
  - $a_1$  for method from Caminade
- Vector competence
  - $b$  from Liu-Helmersson
  - $bm$  from Caminade (transmission probability – host to vector)
  - $c$  from Mordecai (probability mosquito becomes infected given exposure)
- Extrinsic Incubation Period (EIP)
  - EIP for Liu-Helmersson and Caminade
  - $1/EIR$  for Mordecai where EIR = extrinsic incubation rate
- Mosquito mortality
  - $\mu$  for Caminade and Liu-Helmersson
  - $1/l_f$  for Mordecai where  $l_f$  = lifespan in days of the mosquito

Below are the comparisons of the shared parameters across methods with respect to temperature sources and cities.

**Figure S2.1:** Temperature-dependent estimate of biting rate of *Ae. aegypti*

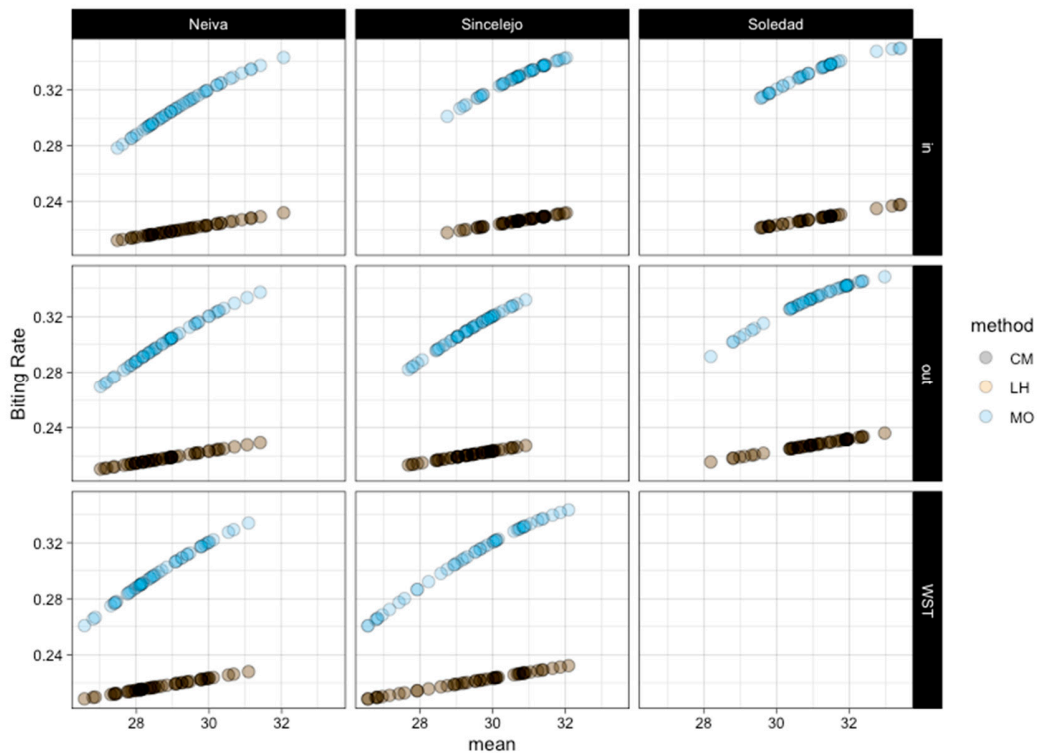

**Figure S2.2:** Temperature-dependent estimate of the probability of successful transmission from human to mosquito (of *Ae. aegypti*) as an estimate for vector competence.

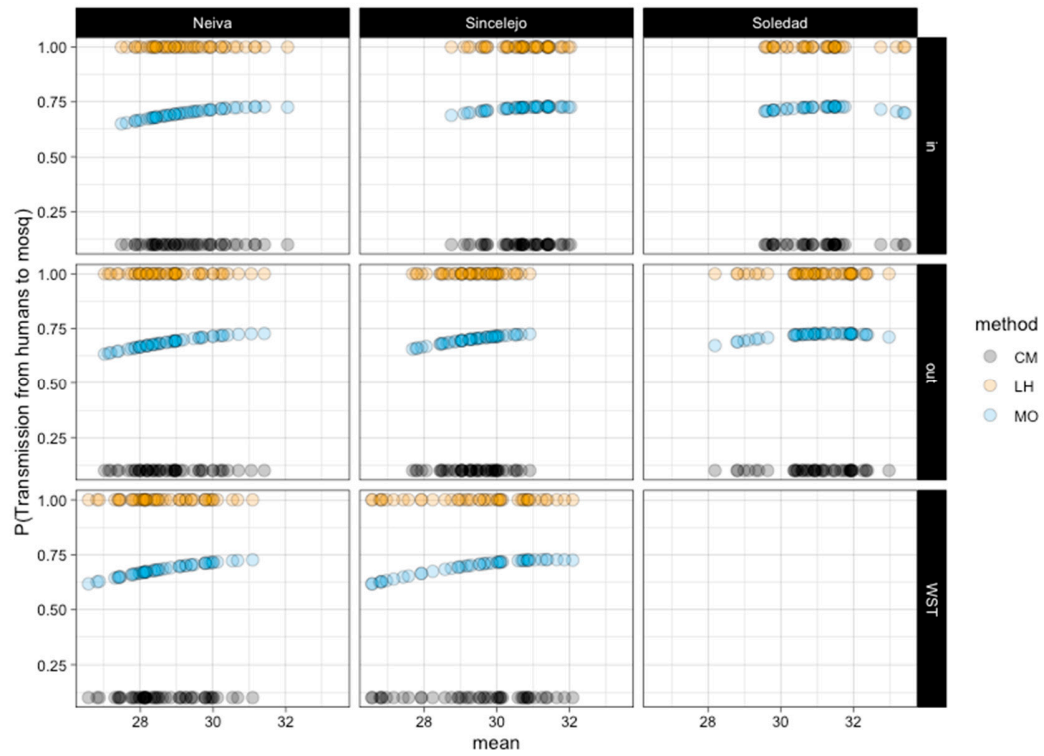

**Figure S2.3:** Temperature-dependent estimate of the extrinsic incubation period of *Ae. aegypti*

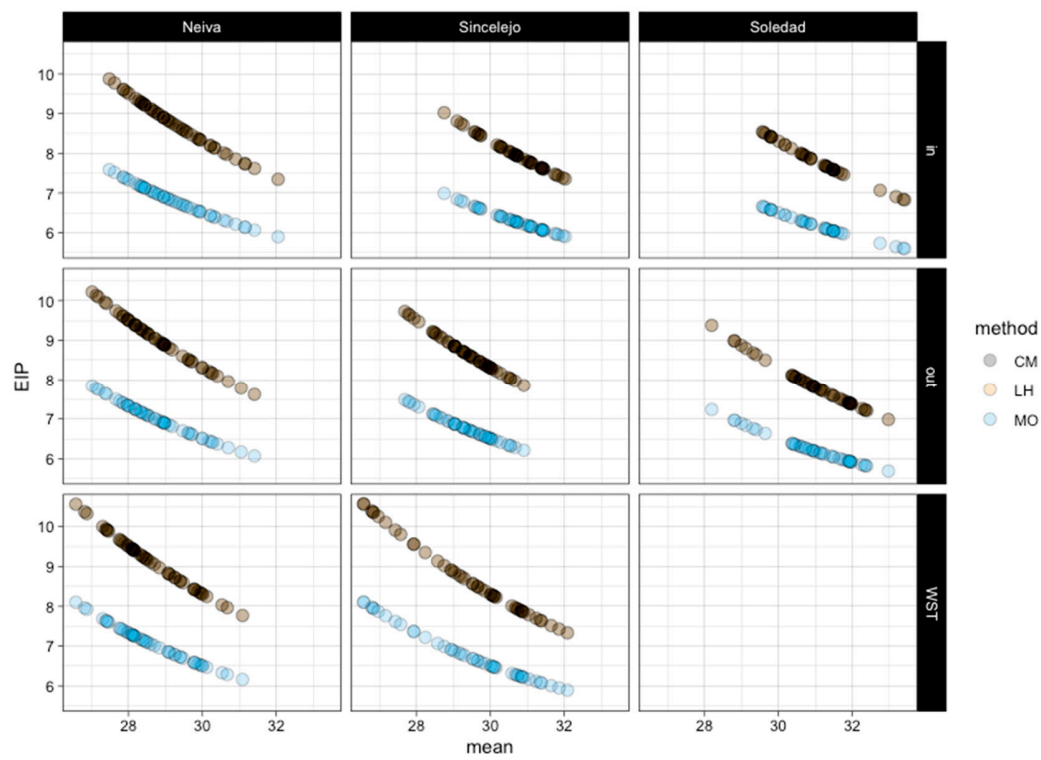

**Figure S2.4:** Temperature-dependent estimate of the mosquito mortality of *Ae. aegypti*

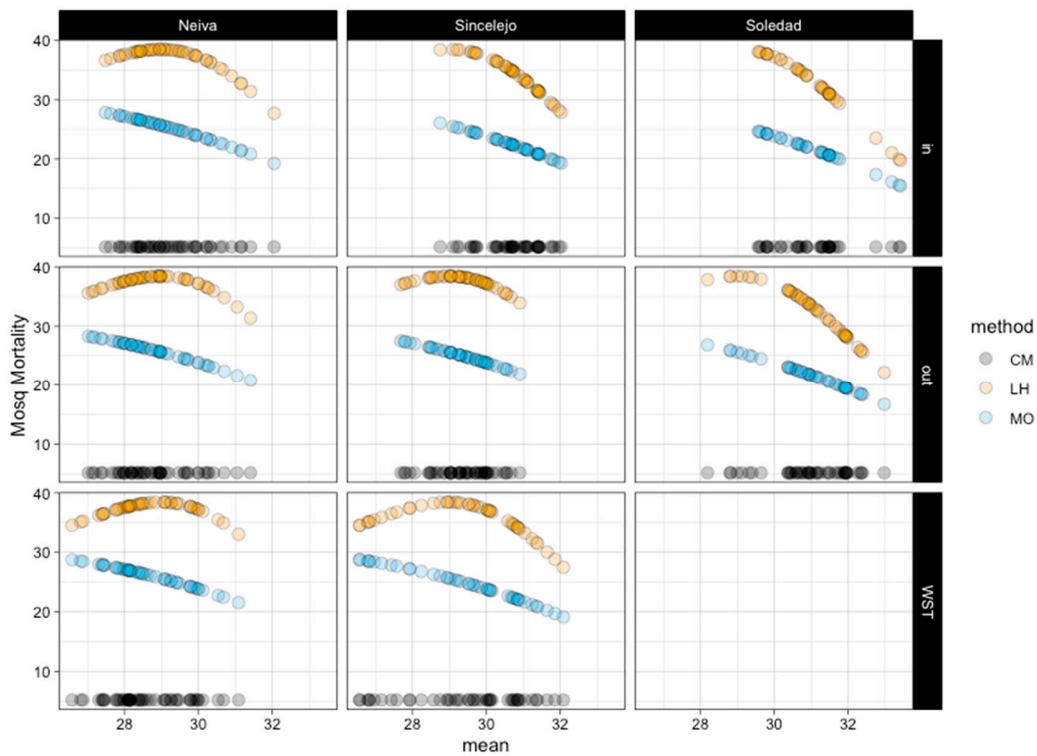

Figure S2.5: Temperature-dependent estimate of the R0 for each method

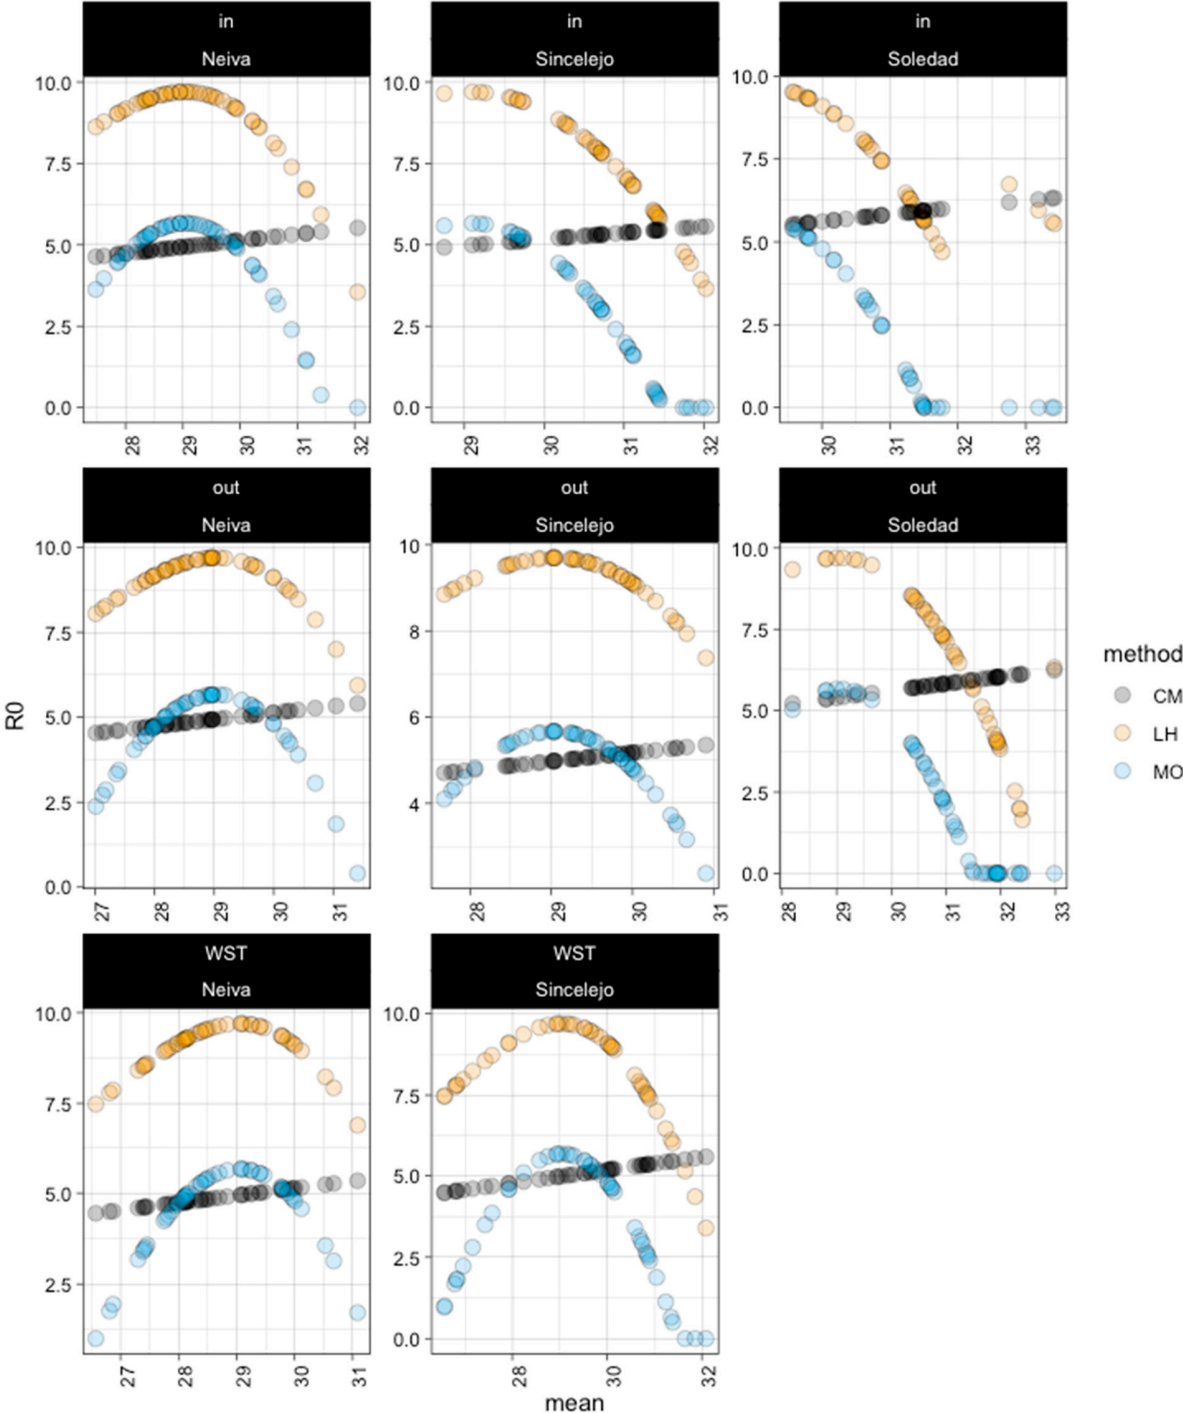

**Figure S2.6:** Distributions of the R0 values per city x data source x modeling method. All distributions were significantly different except for the cases of Soledad vs. Sincelejo (Mordecai method), Nevia vs. Sincelejo (Liu-Helmersson method) and Soledad vs. Sincelejo (Liu-Helmersson method).

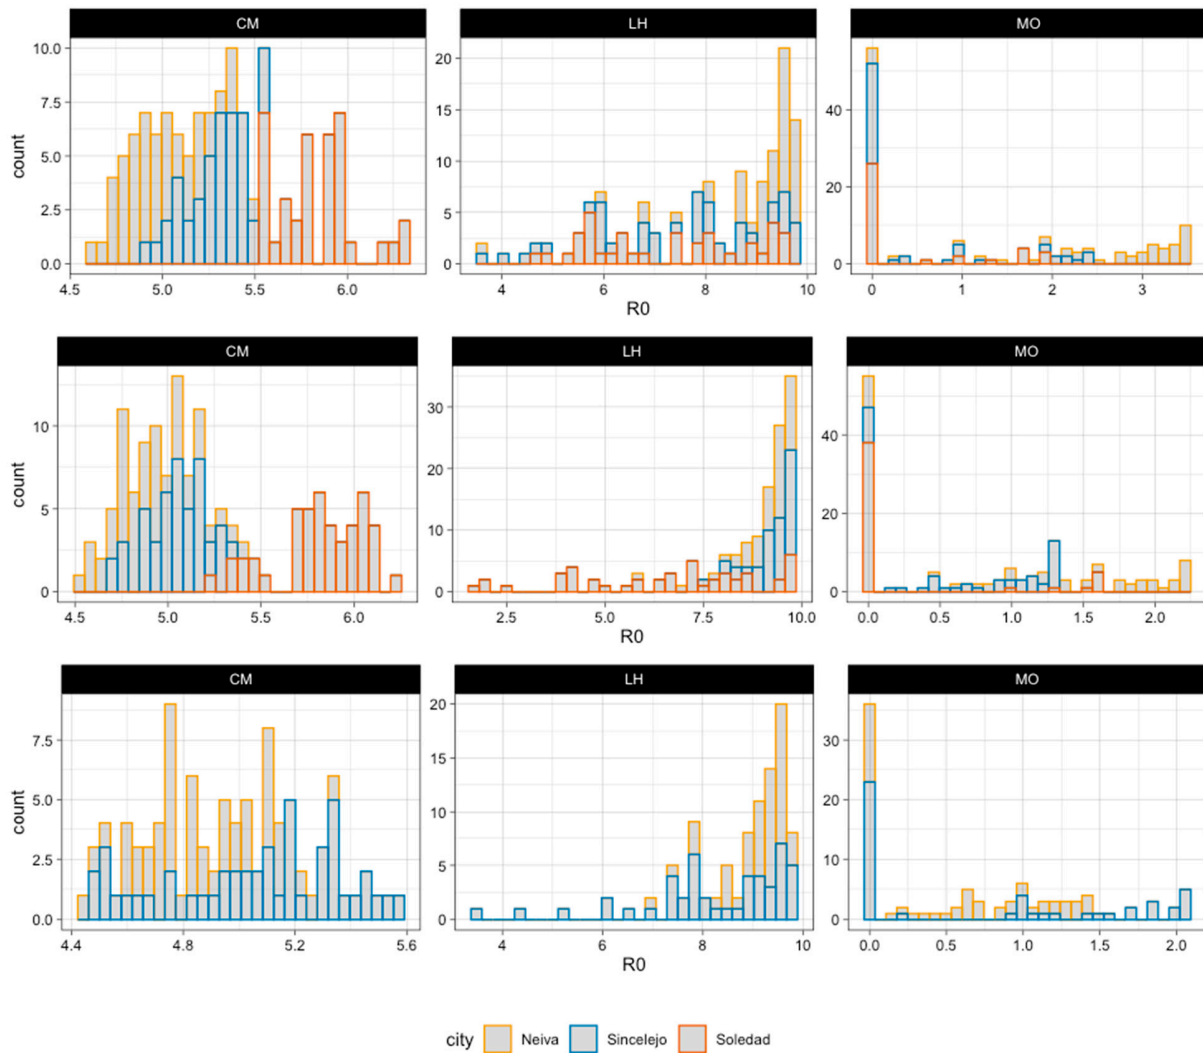

Supplement: s1 [file s1]
